# Supplementary material for: Analysis of Array-CGH Data Using the R and Bioconductor Software Suite
Source: Hindawi journal article supplement (doi:10.1155/2009/201325), 2009-01-01
Supplement: f1 [file 201325.f1.pdf]

## Supplementary Table1

Information on segments after breakpoint detection shown for sample N16. The columns give information about chromosomes 1 to 24 (whereby 23 is X and 24 is Y), smoothing value, gain or loss (where gain is 1, loss is -1 and normal state is 0), kb\_start and kb\_end give the exact Mb position of breakpoint start and end, and banding\_start and banding\_end the corresponding chromosomal bands..

| chromosome | smoothing | gain/loss | kb_start | kb_end | banding_start | banding_end |
|------------|-----------|-----------|----------|--------|---------------|-------------|
| 1          | 0.144     | 0         | 1032     | 45691  | p36.3         | p34.1       |
| 1          | -0.036    | 0         | 45806    | 75909  | p34.1         | p31         |
| 1          | -0.19     | 0         | 76691    | 142715 | p31           | q21         |
| 1          | 0.417     | 1         | 143566   | 155323 | q21           | q23         |
| 1          | -0.047    | 0         | 156057   | 160977 | q23           | q23         |
| 1          | 0.392     | 1         | 161301   | 165055 | q23           | q24         |
| 1          | -0.055    | 0         | 165441   | 177454 | q24           | q25         |
| 1          | 0.386     | 1         | 177629   | 182125 | q25           | q25         |
| 1          | -0.048    | 0         | 182574   | 227684 | q25           | q42         |
| 1          | 0.348     | 1         | 229057   | 247097 | q42           | q44         |
| 2          | 0.141     | 0         | 315      | 202677 | p25           | q33         |
| 2          | 0.02      | 0         | 203318   | 242568 | q33           | q37         |
| 3          | -0.081    | 0         | 243      | 104130 | p26           | q12         |
| 3          | 0.034     | 0         | 105264   | 150639 | q13.1         | q25         |
| 3          | -0.103    | 0         | 151152   | 165377 | q25           | q26.1       |
| 3          | 0.035     | 0         | 166995   | 199069 | q26.1         | q29         |
| 4          | 0.044     | 0         | 131      | 2829   | p16           | p16         |
| 4          | 0.248     | 1         | 3454     | 16083  | p16           | p15.3       |
| 4          | 0.086     | 0         | 17067    | 55786  | p15.3         | q12         |
| 4          | -0.111    | 0         | 55922    | 121157 | q12           | q27         |
| 4          | -0.214    | -1        | 121230   | 190979 | q27           | q35         |
| 5          | 0.072     | 0         | 1341     | 50001  | p15.3         | q11.1       |
| 5          | -0.253    | -1        | 50115    | 180570 | q11.1         | q35         |
| 6          | 0.015     | 0         | 149      | 29408  | p25           | p22         |
| 6          | 0.228     | 1         | 31733    | 33542  | p21.3         | p21.3       |
| 6          | 0.727     | 2         | 33629    | 33945  | p21.3         | p21.3       |
| 6          | 0.467     | 1         | 34284    | 34985  | p21.3         | p21.3       |
| 6          | 0.128     | 0         | 35487    | 35487  | p21.3         | p21.3       |
| 6          | 0.621     | 2         | 35661    | 44322  | p21.3         | p21.1       |
| 6          | 0.215     | 1         | 44425    | 62656  | p21.1         | q11         |
| 6          | -0.011    | 0         | 63844    | 127455 | q12           | q22         |
| 6          | 0.146     | 0         | 128541   | 170732 | q22           | q27         |
| 7          | 0.015     | 0         | 223      | 158577 | p22           | q36         |
| 8          | -0.311    | -1        | 568      | 6685   | p23           | p23         |
| 8          | -0.701    | -2        | 7243     | 7949   | p23           | p23         |

|    |        |    |        |        |       |       |
|----|--------|----|--------|--------|-------|-------|
| 8  | -0.278 | -1 | 8104   | 34371  | p23   | p12   |
| 8  | 0.014  | 0  | 34572  | 121349 | p12   | q24.1 |
| 8  | -0.14  | 0  | 122799 | 142055 | q24.1 | q24.3 |
| 8  | 0.013  | 0  | 142184 | 146085 | q24.3 | q24.3 |
| 9  | -0.266 | -1 | 50     | 29566  | p24   | p21   |
| 9  | 0.148  | 0  | 33066  | 38062  | p13   | p13   |
| 9  | -0.476 | -1 | 43329  | 43329  | p11   | p11   |
| 9  | 0.036  | 0  | 70404  | 140065 | q13   | q34   |
| 10 | 0.042  | 0  | 312    | 42746  | p15   | q11.2 |
| 10 | -0.25  | -1 | 43945  | 54007  | q11.2 | q21   |
| 10 | -0.095 | 0  | 54114  | 135346 | q21   | q26   |
| 11 | -0.11  | 0  | 223    | 44963  | p15   | p11.2 |
| 11 | 0.386  | 1  | 46300  | 47384  | p11.2 | p11.2 |
| 11 | -0.032 | 0  | 47956  | 72088  | p11.2 | q13   |
| 11 | -0.353 | -1 | 72273  | 72273  | q13   | q13   |
| 11 | -0.755 | -2 | 72476  | 72651  | q13   | q13   |
| 11 | -0.098 | 0  | 72857  | 97216  | q13   | q22   |
| 11 | 0.133  | 0  | 98400  | 98400  | q22   | q22   |
| 11 | -0.132 | 0  | 99685  | 134070 | q22   | q25   |
| 12 | 0.11   | 0  | 153    | 51930  | p13   | q13   |
| 12 | 0.27   | 1  | 52009  | 54924  | q13   | q13   |
| 12 | -0.222 | -1 | 54928  | 54928  | q13   | q13   |
| 12 | 0.37   | 1  | 55152  | 55787  | q13   | q13   |
| 12 | 0.124  | 0  | 55820  | 56044  | q13   | q13   |
| 12 | 0.437  | 1  | 56148  | 56202  | q13   | q13   |
| 12 | 0.084  | 0  | 56203  | 110418 | q13   | q24.1 |
| 12 | -0.046 | 0  | 110782 | 131946 | q24.1 | q24.3 |
| 13 | 0.038  | 0  | 18674  | 51548  | q12   | q14   |
| 13 | -0.028 | 0  | 52270  | 108864 | q21   | q33   |
| 13 | 0.052  | 0  | 109014 | 113828 | q33   | q34   |
| 13 | 0.334  | 1  | 113863 | 113863 | q34   | q34   |
| 13 | 0.056  | 0  | 114017 | 114017 | q34   | q34   |
| 14 | -0.174 | 0  | 19651  | 39454  | q11.2 | q21   |
| 14 | -0.107 | 0  | 40463  | 106227 | q21   | q32   |
| 15 | -0.093 | 0  | 19881  | 99969  | q11.2 | q26   |
| 16 | 0.064  | 0  | 102    | 88552  | p13.3 | q24   |
| 17 | 0.119  | 0  | 392    | 20171  | p13   | p11.2 |
| 17 | -0.032 | 0  | 20325  | 78374  | p11.2 | q25   |
| 18 | 0.448  | 1  | 213    | 5005   | p11.3 | p11.3 |
| 18 | -0.217 | -1 | 5352   | 6843   | p11.3 | p11.3 |
| 18 | 0.851  | 2  | 6843   | 14066  | p11.3 | p11.2 |
| 18 | 0.162  | 0  | 14066  | 17460  | p11.2 | q11.2 |
| 18 | 0.699  | 2  | 17993  | 22836  | q11.2 | q11.2 |
| 18 | -0.278 | -1 | 23747  | 75940  | q12   | q23   |
| 19 | 0.009  | 0  | 211    | 23644  | p13.3 | p12   |
| 19 | 0.311  | 1  | 32995  | 63687  | q12   | q13.4 |
| 20 | 0.343  | 1  | 230    | 25023  | p13   | p11.2 |
| 20 | 0.003  | 0  | 26113  | 29580  | p11.1 | q11.2 |
| 20 | 0.319  | 1  | 29779  | 62393  | q11.2 | q13.3 |

|    |        |    |       |        |       |       |
|----|--------|----|-------|--------|-------|-------|
| 21 | -0.115 | 0  | 13545 | 46846  | q11.2 | q22   |
| 22 | -0.034 | 0  | 14497 | 49243  | q11.1 | q13   |
| 22 | 0.287  | 1  | 49426 | 49453  | q13   | q13   |
| 23 | -0.226 | -1 | 536   | 2706   | p22.3 | p22.3 |
| 23 | 0.159  | 0  | 3031  | 92222  | p22.3 | q21   |
| 23 | 0.35   | 1  | 93081 | 154664 | q21   | q28   |
| 24 | -0.751 | -2 | 2931  | 57461  | p11.3 | q12   |
